# Supplementary material
Source: PubMed Central journal article supplement (PMC7153735)
Supplement: NIHMS1563350-supplement-Supplementary_Materials.pdf [file NIHMS1563350-supplement-Supplementary_Materials.pdf]

Supplementary Materials for  
**The E3 ubiquitin ligase Idol controls brain LDL receptor expression,  
ApoE clearance, and A $\beta$  amyloidosis**

Jinkuk Choi, Jie Gao, Jaekwang Kim, Cynthia Hong, Jungsu Kim,\* Peter Tontonoz\*

\*Corresponding author. E-mail: ptontonoz@mednet.ucla.edu (P.T.); kim.jungsu@mayo.edu (J.K.)

Published 18 November 2015, *Sci. Transl. Med.* **7**, 314ra184 (2015)  
DOI: 10.1126/scitranslmed.aad1904

**The PDF file includes:**

- Fig. S1. Idol decreases LDLR protein and promotes LDLR ubiquitination in mouse brain cells.
- Fig. S2. Loss of Idol does not directly affect inflammatory responses.
- Fig. S3. Idol inhibition promotes the clearance of A $\beta$  by microglia.
- Table S1. Data for A $\beta$ 40 shown in Fig. 2A.
- Table S2. Data for A $\beta$ 42 shown in Fig. 2A.
- Table S3. Quantification of A $\beta$  plaque load in Fig. 2E.
- Table S4. Quantification of thioflavin S plaque load in Fig. 3B.
- Table S5. Quantification of CD45 load in Fig. 4B.
- Table S6. Quantification of Iba<sup>+</sup> cells in Fig. 4D.

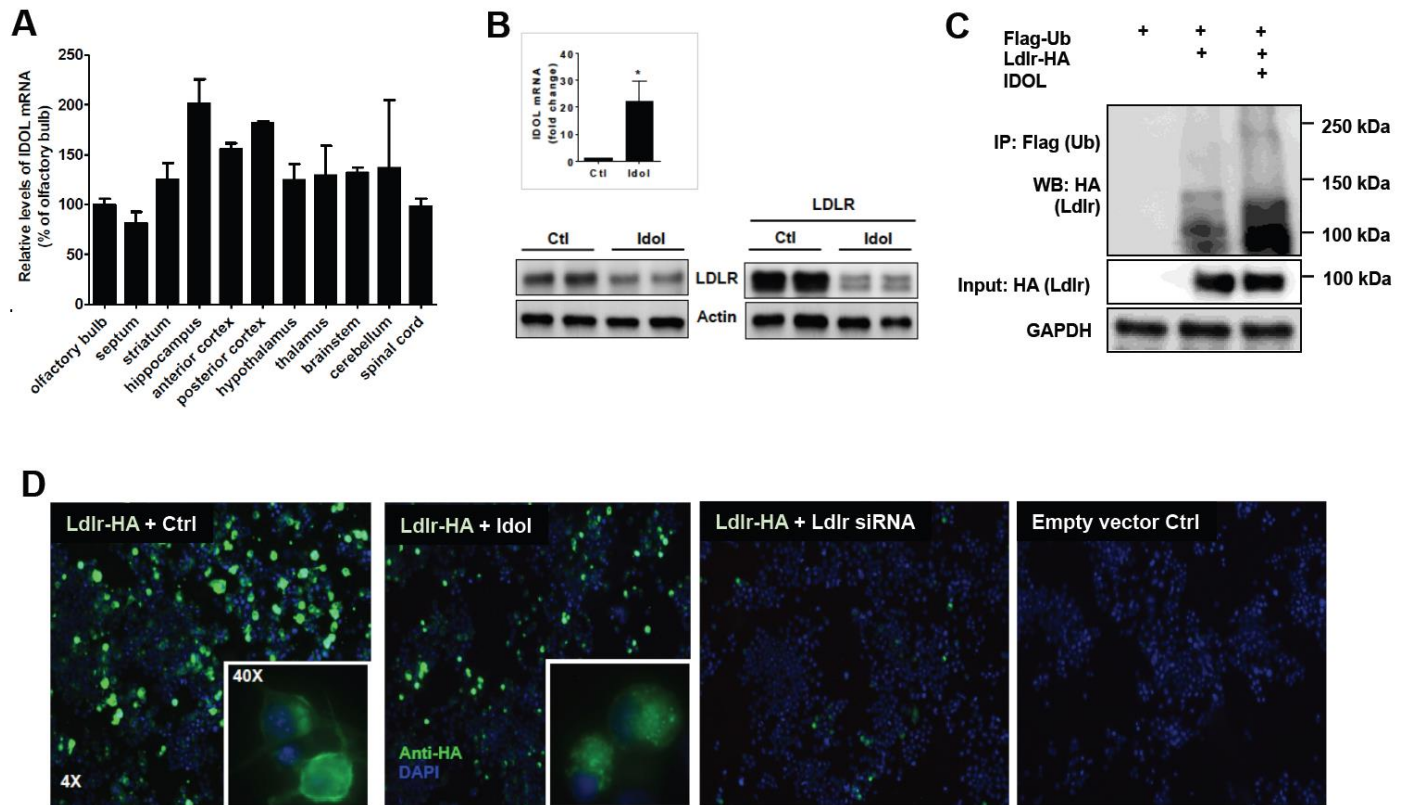

**Fig. S1. Idol decreases LDLR protein and promotes LDLR ubiquitination in mouse brain cells.**

(A) Real-time PCR analysis of Idol expression in different compartments of the central nervous system, isolated from 3.5 month-old C57BL6J mice. Data are normalized to olfactory bulb. Error bars represent SEM. N = 3. (B) Real-time PCR analysis of Idol expression levels and immunoblot analysis of LDLR protein levels after Idol knockdown. Idol expression plasmid (Idol) or control plasmid (Ctl) was transfected to Neuro2a cells with or without LDLR expression plasmid (LDLR). Error bars represent SEM. \*,  $p < 0.05$  by Student's t-test. (C) Immunoblot analysis of LDLR protein level and ubiquitination in the presence of Idol. Flag-tagged ubiquitin (Ub) and HA-tagged LDLR were expressed in Neuro2a cells with or without Idol co-expression. 24 h post-transfection, cell were incubated with 400 nM bafilomycin A1 for 24 h. Cell lysates were immunoprecipitated with Flag antibody and immunoblotted with HA antibody. (D) Representative micrographs showing immunofluorescence staining of Neuro2a cells co-transfected with LDLR-HA expression plasmid and either control or Idol expression plasmid. Green color indicates LDLR-HA stained by anti-HA antibody.

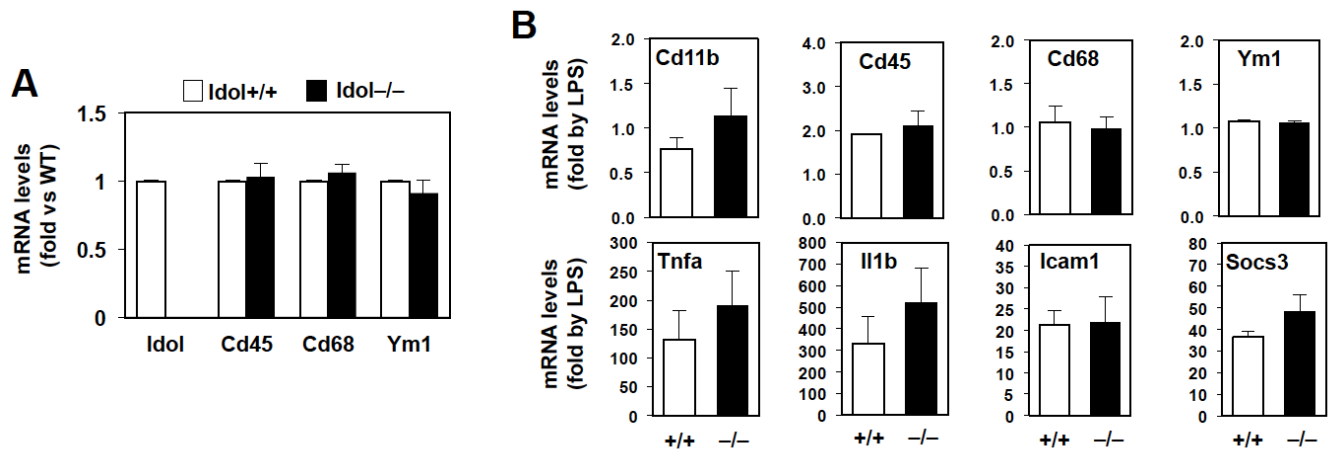

**Fig. S2. Loss of Idol does not directly affect inflammatory responses.** (A) Real-time PCR analysis of *Idol* and microglial marker gene expression in primary microglia isolated from *Idol*<sup>+/+</sup> or *Idol*<sup>-/-</sup> mice. Cells were cultured in DMEM containing 10% FBS prior to harvest. Data are normalized to wild-type control. Error bars represent SEM. (B) Real-time PCR analysis of neuroinflammatory gene expression in response to LPS in primary microglia isolated from *Idol*<sup>+/+</sup> or *Idol*<sup>-/-</sup> mice. Cells were treated with serum-free DMEM containing 100 ng/ml LPS for 4 h prior to harvest. mRNA levels are presented as fold induction by LPS vs. vehicle control. Error bars represent SEM.

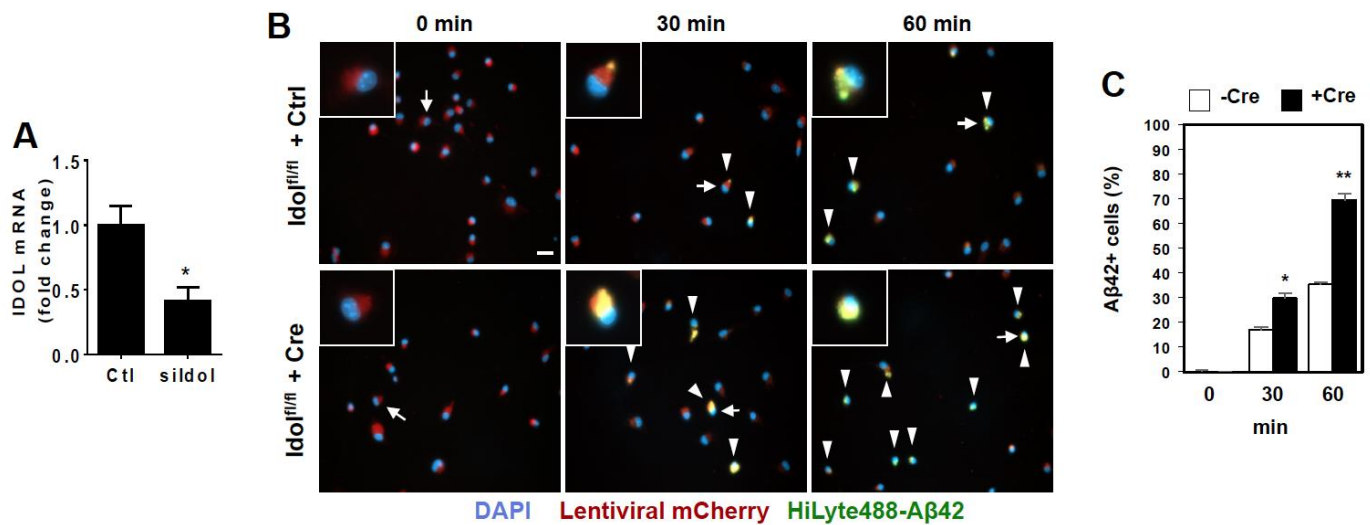

**Fig. S3. Idol inhibition promotes the clearance of A $\beta$  by microglia.** (A) Real-time PCR analysis of Idol in Neuro2a cells transfected with Idol siRNA (siIdol) or scrambled negative control (Ctl), related to Figure 6. Data are from RNA harvested at 48 h post-transfection and are normalized to negative control. Error bars represent SEM. \*,  $p < 0.05$  by Student's t-test. (B) Representative micrographs showing uptake of HiLyte488 fluorescently labeled aggregated A $\beta_{42}$  in primary microglia from *Idol<sup>fl/fl</sup>* mice treated *in vitro* with control mCherry-expressing or Cre/mCherry-expressing lentiviral vector. DAPI (blue); Lentiviral mCherry (red); A $\beta_{42}$  (green). Arrowheads denote A $\beta_{42}$ -positive cells. Arrows denote representative cells shown in the magnified field. Scale bar, 20  $\mu$ m. (C) Quantification of results shown in (B). Error bars represent SEM. \*,  $p < 0.05$ ; \*\*,  $p < 0.01$  by Student's t-test.

**Table S1. Data for A $\beta$ 40 shown in Fig. 2A.**

| <b>A<math>\beta</math>40 (pg/mg tissue) ELISA data for Fig. 2A</b> |           |                  |           |
|--------------------------------------------------------------------|-----------|------------------|-----------|
| <b>Male</b>                                                        |           |                  |           |
| <b>soluble</b>                                                     |           | <b>insoluble</b> |           |
| <b>WT</b>                                                          | <b>KO</b> | <b>WT</b>        | <b>KO</b> |
| 2.344073                                                           | 1.796427  | 1989.072         | 846.0812  |
| 2.638793                                                           | 1.539898  | 1638.396         | 433.6560  |
| 3.500615                                                           | 1.691221  | 2020.978         | 346.9319  |
| 4.366740                                                           | 1.528893  | 2801.148         | 871.2848  |
| 2.045750                                                           | 1.593942  | 2526.885         | 797.9648  |
| 3.236280                                                           |           | 2366.212         |           |
| <b>Female</b>                                                      |           |                  |           |
| <b>soluble</b>                                                     |           | <b>insoluble</b> |           |
| <b>WT</b>                                                          | <b>KO</b> | <b>WT</b>        | <b>KO</b> |
| 4.502602                                                           | 6.021950  | 2746.788         | 2550.714  |
| 5.722557                                                           | 2.156720  | 3202.000         | 2272.099  |
| 6.390170                                                           | 3.135278  | 2991.323         | 2082.000  |
| 6.345493                                                           | 3.352174  | 3232.591         | 2847.890  |
| 8.836700                                                           | 3.239042  | 3237.861         | 2707.436  |
| 6.542100                                                           | 3.542100  | 3805.518         | 2114.403  |

**Table S2. Data for A $\beta$ 42 shown in Fig. 2A.**

| <b>A<math>\beta</math>42 (pg/mg tissue) ELISA data for Fig. 2A</b> |            |           |                  |            |           |
|--------------------------------------------------------------------|------------|-----------|------------------|------------|-----------|
| <b>Male</b>                                                        |            |           |                  |            |           |
| <b>soluble</b>                                                     |            |           | <b>insoluble</b> |            |           |
| <b>WT</b>                                                          | <b>het</b> | <b>KO</b> | <b>WT</b>        | <b>het</b> | <b>KO</b> |
| 12.63166                                                           | 12.123290  | 6.201966  | 10294.18         | 10436.830  | 5749.680  |
| 13.08260                                                           | 8.336532   | 3.293293  | 13319.18         | 8983.113   | 3804.303  |
| 14.87140                                                           | 15.271710  | 3.511020  | 11783.94         | 6122.472   | 3383.310  |
| 19.93512                                                           | 9.101973   | 5.563617  | 12339.33         | 8270.967   | 6338.289  |
| 28.30721                                                           | 10.238130  | 5.123914  | 14421.38         | 12513.560  | 5902.533  |
| 17.43271                                                           | 11.348670  |           | 14061.08         | 8910.378   |           |
|                                                                    |            |           | 12768.13         |            |           |
| <b>Female</b>                                                      |            |           |                  |            |           |
| <b>soluble</b>                                                     |            |           | <b>insoluble</b> |            |           |
| <b>WT</b>                                                          | <b>het</b> | <b>KO</b> | <b>WT</b>        | <b>het</b> | <b>KO</b> |
| 25.32183                                                           | 20.97352   | 8.803017  | 14818.67         | 14564.04   | 12854.29  |
| 17.99380                                                           | 21.83572   | 11.369410 | 15370.41         | 17460.52   | 11056.42  |
| 23.98040                                                           | 21.02117   | 13.860700 | 15877.29         | 13108.66   | 15528.55  |
| 30.86358                                                           | 17.60413   | 16.977340 | 17702.61         | 10668.22   | 14206.94  |
| 49.99380                                                           | 23.74065   | 16.977340 | 15867.00         | 11161.34   | 14217.97  |
| 27.12650                                                           | 22.56790   | 12.163700 | 18703.69         | 16881.73   | 11757.61  |

**Table S3. Quantification of A $\beta$  plaque load in Fig. 2E.**

| <b>Data values for quantification of A<math>\beta</math> plaque load found in Fig. 2E</b> |               |                 |               |                 |
|-------------------------------------------------------------------------------------------|---------------|-----------------|---------------|-----------------|
| Sample                                                                                    | Cortex        |                 | Hippocampus   |                 |
|                                                                                           | Particle area | Particle % area | Particle area | Particle % area |
| Male WT 1                                                                                 | 6.748         | 2.759           | 3.001         | 0.968           |
| Male WT 2                                                                                 | 5.550         | 2.426           | 1.395         | 0.510           |
| Male WT 3                                                                                 | 2.135         | 0.905           | 3.041         | 1.016           |
| Male WT 4                                                                                 | 2.625         | 1.172           | 2.285         | 0.715           |
| Male WT 5                                                                                 | 2.308         | 0.967           | 2.504         | 0.877           |
| Male WT 6                                                                                 | 5.057         | 2.183           | 2.595         | 0.839           |
| Male het 1                                                                                | 2.818         | 1.239           | 2.978         | 1.040           |
| Male het 2                                                                                | 2.622         | 1.095           | 2.554         | 0.933           |
| Male het 3                                                                                | 2.118         | 0.907           | 2.769         | 0.968           |
| Male het 4                                                                                | 2.096         | 0.846           | 2.091         | 0.704           |
| Male het 5                                                                                | 2.007         | 0.925           | 1.409         | 0.526           |
| Male het 6                                                                                | 2.648         | 1.189           | 2.678         | 0.906           |
| Male KO 1                                                                                 | 2.223         | 0.923           | 1.946         | 0.687           |
| Male KO 2                                                                                 | 1.562         | 0.655           | 0.638         | 0.217           |
| Male KO 3                                                                                 | 2.260         | 1.039           | 1.423         | 0.517           |
| Male KO 4                                                                                 | 2.314         | 0.849           | 0.414         | 0.145           |
| Male KO 5                                                                                 | 1.989         | 0.761           | 0.724         | 0.231           |
| Male KO 6                                                                                 | 2.185         | 0.924           | 1.830         | 0.563           |
| Female WT 1                                                                               | 4.816         | 2.004           | 3.188         | 1.171           |
| Female WT 2                                                                               | 7.827         | 3.026           | 4.940         | 1.615           |
| Female WT 3                                                                               | 7.547         | 2.859           | 3.387         | 1.172           |
| Female WT 4                                                                               | 4.688         | 1.978           | 3.047         | 1.065           |
| Female WT 5                                                                               | 8.561         | 3.572           | 2.428         | 0.928           |
| Female WT 6                                                                               | 6.674         | 2.829           | 4.506         | 1.648           |
| Female het 1                                                                              | 9.708         | 4.024           | 3.737         | 1.371           |
| Female het 2                                                                              | 3.919         | 1.764           | 4.562         | 1.436           |
| Female het 3                                                                              | 6.020         | 2.371           | 2.197         | 1.026           |
| Female het 4                                                                              | 5.148         | 2.242           | 3.661         | 1.258           |
| Female het 5                                                                              | 2.961         | 1.091           | 2.875         | 1.029           |
| Female het 6                                                                              | 5.187         | 2.143           | 3.388         | 1.140           |
| Female KO 1                                                                               | 1.651         | 0.741           | 0.606         | 0.203           |
| Female KO 2                                                                               | 2.282         | 1.076           | 1.086         | 0.381           |
| Female KO 3                                                                               | 1.654         | 0.789           | 1.650         | 0.566           |
| Female KO 4                                                                               | 2.687         | 1.173           | 0.939         | 0.323           |
| Female KO 5                                                                               | 2.257         | 0.966           | 2.704         | 0.974           |
| Female KO 6                                                                               | 3.157         | 1.457           | 3.674         | 1.283           |

**Table S4. Quantification of thioflavin S plaque load in Fig. 3B.**

| <b>Data values for quantification of ThioS plaque load found in Fig. 3B</b> |               |                |               |                |
|-----------------------------------------------------------------------------|---------------|----------------|---------------|----------------|
| Sample                                                                      | Cortex        |                | Hippocampus   |                |
|                                                                             | Particle area | Particle %area | Particle area | Particle %area |
| Male WT 1-1                                                                 | 0.594         | 0.300          | 0.895         | 0.261          |
| Male WT 1-2                                                                 | 1.322         | 0.544          | 0.803         | 0.215          |
| Male WT 2-1                                                                 | 1.169         | 0.577          | 0.939         | 0.332          |
| Male WT 2-2                                                                 | 0.986         | 0.473          | 1.036         | 0.320          |
| Male WT 3-1                                                                 | 1.746         | 0.831          | 1.330         | 0.455          |
| Male WT 3-2                                                                 | 1.469         | 0.654          | 0.789         | 0.272          |
| Male WT 4-1                                                                 | 1.072         | 0.463          | 1.247         | 0.432          |
| Male WT 4-2                                                                 | 1.033         | 0.521          | 0.843         | 0.318          |
| Male WT 5-1                                                                 | 0.867         | 0.426          | 0.449         | 0.177          |
| Male WT 5-2                                                                 | 1.359         | 0.647          | 0.926         | 0.311          |
| Male WT 6-1                                                                 | 0.999         | 0.438          | 0.900         | 0.264          |
| Male WT 6-2                                                                 | 2.197         | 1.045          | 0.941         | 0.276          |
| Male het 1-1                                                                | 0.940         | 0.477          | 0.410         | 0.136          |
| Male het 2-1                                                                | 1.470         | 0.708          | 0.624         | 0.220          |
| Male het 2-1                                                                | 1.788         | 1.136          | 0.789         | 0.246          |
| Male het 2-2                                                                | 0.295         | 0.123          | 0.956         | 0.315          |
| Male het 3-1                                                                | 1.783         | 0.687          | 0.880         | 0.303          |
| Male het 3-2                                                                | 0.646         | 0.314          | 0.210         | 0.070          |
| Male het 4-1                                                                | 0.883         | 0.490          | 0.497         | 0.187          |
| Male het 4-2                                                                | 0.663         | 0.302          | 0.547         | 0.212          |
| Male het 5-1                                                                | 0.937         | 0.419          | 1.332         | 0.461          |
| Male het 5-2                                                                | 0.753         | 0.419          | 0.749         | 0.279          |
| Male het 6-1                                                                | 0.764         | 0.384          | 1.036         | 0.347          |
| Male het 6-2                                                                | 0.849         | 0.557          | 0.284         | 0.090          |
| Male KO 1                                                                   | 0.846         | 0.442          | 0.550         | 0.190          |
| Male KO 2                                                                   | 0.504         | 0.224          | 0.662         | 0.219          |
| Male KO 3-1                                                                 | 0.383         | 0.274          | 0.641         | 0.212          |
| Male KO 3-2                                                                 | 0.739         | 0.336          | 1.342         | 0.387          |
| Male KO 4-1                                                                 | 0.446         | 0.219          | 0.671         | 0.218          |
| Male KO 4-2                                                                 | 0.635         | 0.277          | 0.539         | 0.168          |
| Male KO 5-1                                                                 | 0.556         | 0.249          | 0.435         | 0.131          |
| Male KO 5-2                                                                 | 0.211         | 0.078          | 0.229         | 0.076          |
| Male KO 6-1                                                                 | 0.590         | 0.284          | 1.130         | 0.377          |
| Male KO 6-2                                                                 | 0.376         | 0.206          | 0.525         | 0.182          |
| Female WT 1                                                                 | 1.788         | 0.711          | 0.937         | 0.282          |
| Female WT 2                                                                 | 1.473         | 0.712          | 1.746         | 0.546          |



|                |       |       |       |       |
|----------------|-------|-------|-------|-------|
| Female WT 3-1  | 0.995 | 0.608 | 1.025 | 0.386 |
| Female WT 3-2  | 2.560 | 1.052 | 0.709 | 0.258 |
| Female WT 4-1  | 0.699 | 0.432 | 1.008 | 0.386 |
| Female WT 4-2  | 1.388 | 0.704 | 0.867 | 0.323 |
| Female WT 5-1  | 1.011 | 0.419 | 0.860 | 0.296 |
| Female WT 5-2  | 1.298 | 0.561 | 0.921 | 0.301 |
| Female WT 6-1  | 2.151 | 1.050 | 0.479 | 0.177 |
| Female WT 6-2  | 2.511 | 1.257 | 1.497 | 0.480 |
| Female het 1   | 1.904 | 0.973 | 1.138 | 0.364 |
| Female het 2   | 1.394 | 0.757 | 2.116 | 0.655 |
| Female het 3   | 1.748 | 0.798 | 1.085 | 0.383 |
| Female het 4   | 1.472 | 0.613 | 1.252 | 0.421 |
| Female het 5-1 | 1.005 | 0.439 | 0.563 | 0.197 |
| Female het 5-2 | 0.774 | 0.308 | 0.589 | 0.211 |
| Female het 6-1 | 1.361 | 0.699 | 0.943 | 0.314 |
| Female het 6-2 | 1.300 | 0.609 | 0.877 | 0.290 |
| Female KO 1    | 1.566 | 0.704 | 0.979 | 0.337 |
| Female KO 2    | 1.037 | 0.451 | 0.612 | 0.209 |
| Female KO 3-1  | 0.978 | 0.521 | 0.714 | 0.239 |
| Female KO 3-2  | 1.213 | 0.665 | 0.659 | 0.239 |
| Female KO 4-1  | 0.123 | 0.069 | 0.635 | 0.224 |
| Female KO 4-2  | 0.635 | 0.319 | 0.692 | 0.236 |
| Female KO 5-1  | 0.541 | 0.294 | 0.566 | 0.196 |
| Female KO 5-2  | 0.921 | 0.514 | 0.741 | 0.249 |
| Female KO 6-1  | 0.833 | 0.358 | 0.535 | 0.181 |
| Female KO 6-2  | 0.505 | 0.244 | 0.398 | 0.131 |

Replicates were included when samples from different hemispheres were available.

**Table S5. Quantification of CD45 load in Fig. 4B.**

| <b>Data values for quantification of CD45 load found in Fig. 4B</b> |         |          |         |           |            |           |
|---------------------------------------------------------------------|---------|----------|---------|-----------|------------|-----------|
| % area                                                              | Male WT | Male het | Male KO | Female WT | Female het | Female KO |
| cortex 1                                                            | 0.728   | 0.995    | 0.332   | 1.199     | 1.244      | 0.367     |
| cortex 2                                                            | 1.430   | 0.544    | 0.236   | 2.286     | 0.817      | 0.418     |
| cortex 3                                                            | 1.233   | 0.510    | 0.694   | 1.630     | 0.969      | 0.410     |
| cortex 4                                                            | 0.889   | 0.542    | 0.535   | 0.785     | 0.761      | 0.254     |
| cortex 5                                                            | 0.706   | 0.909    | 0.229   | 0.753     | 0.936      | 0.221     |
| cortex 6                                                            | 0.883   | 0.807    | 0.285   | 0.567     | 0.967      | 0.399     |
| % area                                                              | Male WT | Male het | Male KO | Female WT | Female het | Female KO |
| hippocampus 1                                                       | 1.213   | 0.455    | 0.436   | 0.859     | 1.300      | 0.294     |
| hippocampus 2                                                       | 1.170   | 1.124    | 0.175   | 1.018     | 1.120      | 0.246     |
| hippocampus 3                                                       | 0.551   | 0.547    | 0.400   | 1.016     | 0.941      | 0.523     |
| hippocampus 4                                                       | 0.785   | 0.762    | 0.596   | 1.264     | 0.705      | 0.427     |
| hippocampus 5                                                       | 0.719   | 0.690    | 0.601   | 1.104     | 1.092      | 0.765     |
| hippocampus 6                                                       | 0.581   | 0.734    | 0.283   | 0.915     | 0.751      | 0.641     |

**Table S6. Quantification of Iba<sup>+</sup> cells in Fig. 4D.**

| <b>Data values for quantification of Iba1<sup>+</sup> cells/mm<sup>2</sup> found in Fig. 4D</b> |                 |     |    |        |     |    |        |     |    |        |     |    |
|-------------------------------------------------------------------------------------------------|-----------------|-----|----|--------|-----|----|--------|-----|----|--------|-----|----|
| # per .3125 mm <sup>2</sup>                                                                     |                 |     |    |        |     |    |        |     |    |        |     |    |
|                                                                                                 | hippocampal CA1 |     |    |        |     |    | Cortex |     |    |        |     |    |
|                                                                                                 | Male            |     |    | Female |     |    | Male   |     |    | Female |     |    |
| Pic #                                                                                           | WT              | het | KO | WT     | het | KO | WT     | het | KO | WT     | het | KO |
| 1                                                                                               | 65              | 49  | 46 | 70     | 60  | 54 | 31     | 30  | 24 | 43     | 34  | 33 |
| 2                                                                                               | 64              | 70  | 49 | 74     | 71  | 44 | 34     | 33  | 38 | 41     | 34  | 21 |
| 3                                                                                               | 60              | 52  | 40 | 62     | 52  | 45 | 38     | 31  | 33 | 37     | 28  | 38 |
| 4                                                                                               | 56              | 52  | 55 | 52     | 51  | 39 | 29     | 28  | 31 | 42     | 35  | 30 |
| 5                                                                                               | 69              | 30  | 40 | 76     | 58  | 39 | 37     | 17  | 36 | 44     | 43  | 26 |
| 6                                                                                               | 78              | 43  | 40 | 65     | 67  | 53 | 30     | 26  | 24 | 37     | 35  | 25 |
| 7                                                                                               | 54              | 50  | 46 | 90     | 64  | 83 | 32     | 28  | 27 | 47     | 43  | 40 |
| 8                                                                                               | 65              | 62  | 41 | 81     | 72  | 50 | 44     | 37  | 23 | 50     | 31  | 28 |
| 9                                                                                               | 52              | 51  | 37 | 70     | 70  | 39 | 45     | 46  | 17 | 52     | 58  | 25 |
| 10                                                                                              | 63              | 56  | 33 | 73     | 72  | 66 | 49     | 38  | 25 | 36     | 33  | 36 |
| 11                                                                                              | 58              |     | 41 | 92     | 70  | 31 | 33     |     | 22 | 70     | 34  | 30 |
| 12                                                                                              |                 |     |    | 84     |     | 56 |        |     |    | 56     |     | 36 |

Each picture was taken from a unique hemisphere.  
Two pictures were taken from one mouse when samples were available.  
Number of mice analyzed for each group was 6.
